# Supplementary material for: Improving Survival of Juvenile Scalloped Spiny Lobster (Panulirus homarus) and Crucifix Crab (Charybdis feriatus) Using Shelter and Live Prey
Source: MDPI journal article supplement (doi:10.3390/ani11020370), 2021-02-02
Supplement: s1 [file s1]

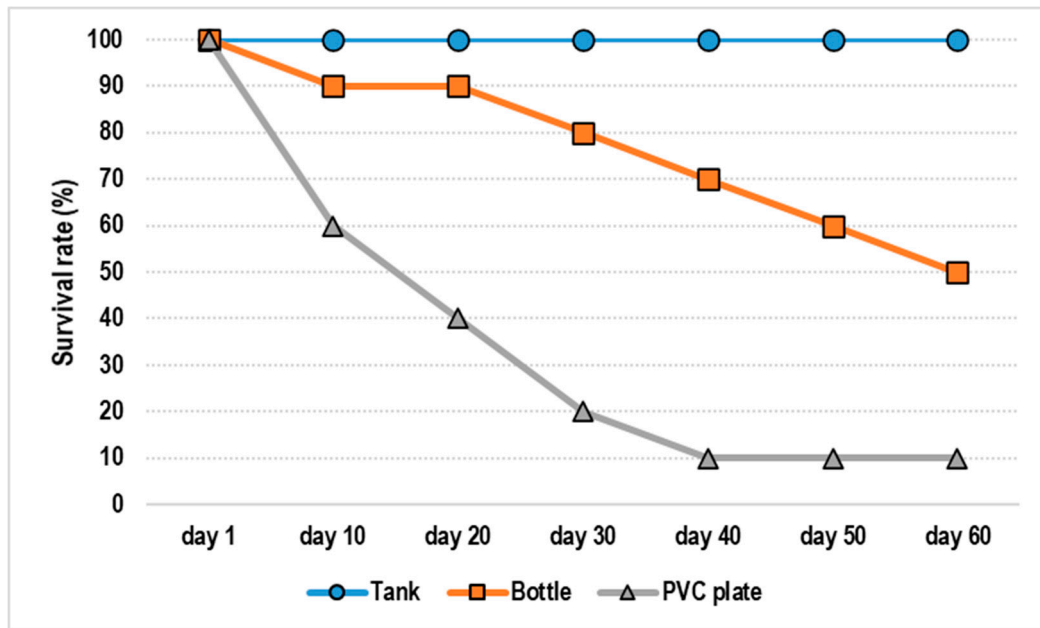

**Figure S1.** Space requirement test for *Charybdis feriatus*. Each space was rearing one crab individually with 10 replicates. The tank group got 100% survival during the test, next was the Bottle group 50% and the PVC plate was 10%. Tank: length 60cm, width 41.5cm and height 9.5cm; Bottle: circular bottom diameter 7.5cm, 400-ml; PVC plate: circular bottom diameter 7.5cm, 100ml. Size of juvenile crabs: average weight:  $1.05 \pm 0.50$  g; average carapace width:  $16.10 \pm 2.62$  mm.

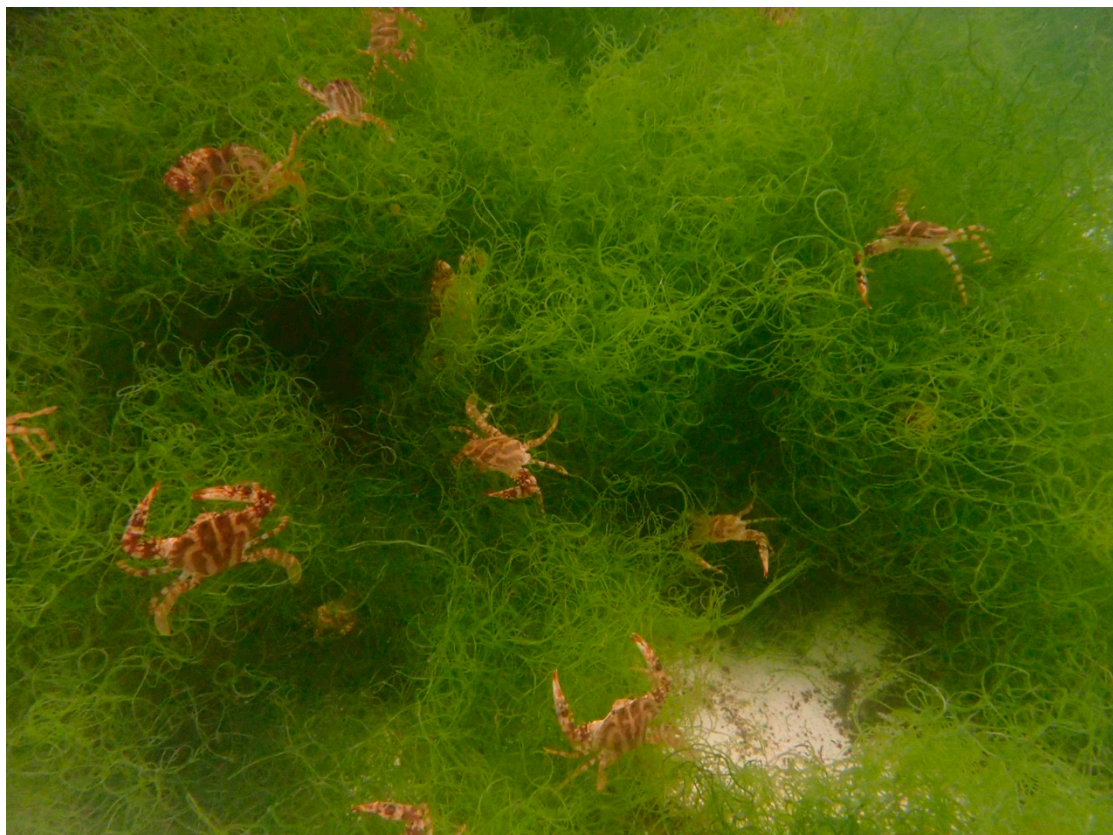

**Figure S2.** Seaweed (*Chaetomorpha crassa*) for the *Charybdis feriatus* shelter experiment.

**Table S1.** *Panulirus homarus* pueruli to postlarvae (PL, N = 5)

| Stage   | Carapace width (cm) | Growth rate% |
|---------|---------------------|--------------|
| pueruli | 1.23                |              |
| PL 1    | 1.4                 | 14%          |
| PL 2    | 1.75                | 25%          |
| PL 3    | 2.2                 | 26%          |
| PL 4    | 2.5                 | 14%          |
| PL 5    | 3                   | 20%          |
| PL 6    | 3.78                | 26%          |
| PL 7    | 5.05                | 35%          |

**Table S2.** *Charybdis feriatus* zoea and megalopa rearing process

| Crab larval stage | Prey                                        | During days |
|-------------------|---------------------------------------------|-------------|
| Zoea 1            | Rotifer (density of 0.1-0.5/ml)             | 3-5 days    |
| Zoea 2            | Rotifer (density of 0.5-1/ml)               | 3-4 days    |
| Zoea 3            | Rotifer (density of 0.5-1/ml)               | 3-5 days    |
|                   | Copepod (density of 0.5-1/l)                |             |
| Zoea 4            | Rotifer (density of 0.1-0.5/ml)             | 3-5 days    |
|                   | Copepod (density of 0.5-1/l)                |             |
| Zoea 5            | Copepod (density of 0.5-1/l)                | 3-5 days    |
|                   | <i>Artemia</i> nauplii (density of 0.5-1/l) |             |
| Zoea 6            | Copepod (density of 0.5-1/l)                | 5-6 days    |
|                   | <i>Artemia</i> nauplii (density of 0.5-1/l) |             |
| Megalopa          | Copepod (density of 0.5-1/l)                | 3-4 days    |
|                   | <i>Artemia</i> nauplii (density of 0.5-1/l) |             |
|                   | Fresh mysis shrimp (wet weight 100g)        |             |

**Table S3.** Juvenile to mature *Charybdis feriatus* (N = 5)

| Stage | Carapace width (cm) | Growth rate% |
|-------|---------------------|--------------|
| C1    | 0.3                 |              |
| C2    | 0.5                 | 67%          |
| C3    | 0.7                 | 40%          |
| C4    | 1                   | 43%          |
| C5    | 1.3                 | 30%          |
| C6    | 1.6                 | 23%          |
| C7    | 2.4                 | 50%          |
| C8    | 3.2                 | 33%          |
| C9    | 4.2                 | 31%          |
| C10   | 6.4                 | 52%          |
| C11   | 7.3                 | 14%          |
| C12   | 8.5                 | 16%          |

**Table S4.** Pair cannibalism test for *Charybdis feriatus*. Juvenile crabs (pair) were rearing in tanks (the bottom area is 1800 cm<sup>2</sup>).

| Repeats      | Before cannibalism happened<br>(days) |
|--------------|---------------------------------------|
| Pair 1       | 12                                    |
| Pair 2       | 0                                     |
| Pair 3       | 5                                     |
| Pair 4       | 2                                     |
| Average days | 4.75 ± 4.548                          |

Size of juvenile crabs: average weight: 2.25 ± 0.60 g; average carapace width: 23.63 ± 1.93 mm.

**Table S5.** Group cannibalism test for *Charybdis feriatus*. Ten juvenile crabs (group) were rearing in tanks (the bottom area is 1800 cm<sup>2</sup>).

| Repeats             | Day 1    | Day 7   | Survival rate (%) |
|---------------------|----------|---------|-------------------|
| 1                   | 10       | 4       | 40 %              |
| 2                   | 10       | 3       | 30 %              |
| 3                   | 10       | 5       | 50 %              |
| Average survive (N) | 10 ± 0.0 | 4 ± 0.8 | 40 ± 8.2 %        |

Size of juvenile crabs: aver weight: 1.09 ± 0.62 g; average carapace width: 17.30 ± 3.52 mm.
